# Supplementary material for: Synthesis of substituted triazole–pyrazole hybrids using triazenylpyrazole precursors
Source: publisher site journal article supplement (doi:10.3762/bjoc.20.121), 2024-06-20
Supplement: Additional file 3 [file 1860-5397-20-121-S3.pdf]

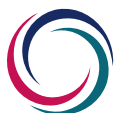

## Supporting Information

for

### **Synthesis of substituted triazole–pyrazole hybrids using triazenylpyrazole precursors**

Simone Gräßle, Laura Holzhauer, Nicolai Wippert, Olaf Fuhr, Martin Nieger, Nicole Jung and Stefan Bräse

*Beilstein J. Org. Chem.* **2024**, *20*, 1396–1404. [doi:10.3762/bjoc.20.121](https://doi.org/10.3762/bjoc.20.121)

### **Information on the availability of the data and the physical material of the target compounds**

General information: The following list includes the materials produced in this study which were made available through the Molecule Archive at KIT (<https://compound-platform.eu/>). The archive stores the materials for further reuse and review – interested academic scientists can order materials for different scientific collaborations or as reference compounds. The materials can be found via the DOI link given below or can be accessed through the Molecule Archive list in the Chemotion repository: <https://chemotion-repository.net/home/moleculeArchive>

| Compound | Smiles Code                                                       | Sample DOI                                                                                                                          |
|----------|-------------------------------------------------------------------|-------------------------------------------------------------------------------------------------------------------------------------|
| 19g      | <chem>[N-]=[N+]=Nc1nn(c(c1)C)c1ccc(cc1)C#N</chem>                 | <a href="https://dx.doi.org/10.14272/KIQBPEXSAZKVRR-UHFFFAOYSA-N.3">https://dx.doi.org/10.14272/KIQBPEXSAZKVRR-UHFFFAOYSA-N.3</a>   |
| 17e      | <chem>N#Cc1ccc(cc1)n1nc(cc1C)/N=N/N(C(C)C)C(C)C</chem>            | <a href="https://dx.doi.org/10.14272/RSDVJJOPRTZAOO-XUTLUUPIISA-N.1">https://dx.doi.org/10.14272/RSDVJJOPRTZAOO-XUTLUUPIISA-N.1</a> |
| 18e      | <chem>N#Cc1ccc(cc1)n1nc(cc1/N=N/N(C(C)C)C(C)C)C</chem>            | <a href="https://dx.doi.org/10.14272/WPXPVVIOPAJXSL-XUTLUUPIISA-N.1">https://dx.doi.org/10.14272/WPXPVVIOPAJXSL-XUTLUUPIISA-N.1</a> |
| 17f      | <chem>CC(N(C(C)C)/N=N/c1nn(c(c1)C)c1ccc(cc1)[N+](=O)[O-])C</chem> | <a href="https://dx.doi.org/10.14272/LQZXCDPUXUEILJ-HTXNQAPBSA-N.1">https://dx.doi.org/10.14272/LQZXCDPUXUEILJ-HTXNQAPBSA-N.1</a>   |
| 18f      | <chem>CC(N(C(C)C)/N=N/c1cc(nn1c1ccc(cc1)[N+](=O)[O-])C)C</chem>   | <a href="https://dx.doi.org/10.14272/VRKHTXPHTAWWEY-HTXNQAPBSA-N.1">https://dx.doi.org/10.14272/VRKHTXPHTAWWEY-HTXNQAPBSA-N.1</a>   |

|      |                                                        |                                                                                                                                                                                                                                                                        |
|------|--------------------------------------------------------|------------------------------------------------------------------------------------------------------------------------------------------------------------------------------------------------------------------------------------------------------------------------|
| 17k  | CCOC(=O)c1cn(nc1/N=N/N(C(C)C)C(C)C)Cc1ccc(cc1)Br       | <a href="https://dx.doi.org/10.14272/ZYMNXIBCZDWSHX-XTQSDGFTSA-N.1">https://dx.doi.org/10.14272/ZYMNXIBCZDWSHX-XTQSDGFTSA-N.1</a>                                                                                                                                      |
| 18k  | CCOC(=O)c1cnn(c1/N=N/N(C(C)C)C(C)C)Cc1ccc(cc1)Br       | <a href="https://dx.doi.org/10.14272/FFWКУULMXDRWPI-GHVJWSGMSA-N.1">https://dx.doi.org/10.14272/FFWКУULMXDRWPI-GHVJWSGMSA-N.1</a>                                                                                                                                      |
| 17d  | CC(N(C(C)C)/N=N/c1nn(c(c1)C)Cc1ccc(cc1)C               | <a href="https://dx.doi.org/10.14272/FEHNUWIZIPJQLZ-CZIZESTLSA-N.1">https://dx.doi.org/10.14272/FEHNUWIZIPJQLZ-CZIZESTLSA-N.1</a>                                                                                                                                      |
| 18d  | CC(N(C(C)C)/N=N/c1cc(nn1Cc1cccc1)C)C                   | <a href="https://dx.doi.org/10.14272/OSZGZNAJFDDFLV-CZIZESTLSA-N.1">https://dx.doi.org/10.14272/OSZGZNAJFDDFLV-CZIZESTLSA-N.1</a>                                                                                                                                      |
| 17r  | N#Cc1cn(nc1/N=N/N(C(C)C)C(C)C)Cc1ccc(cc1)F             | <a href="https://dx.doi.org/10.14272/ADGUCVKMBUJWJM-LSDHQDQOSA-N.1">https://dx.doi.org/10.14272/ADGUCVKMBUJWJM-LSDHQDQOSA-N.1</a>                                                                                                                                      |
| 18r  | N#Cc1cnn(c1/N=N/N(C(C)C)C(C)C)Cc1ccc(cc1)F             | <a href="https://dx.doi.org/10.14272/HEZWXNUXEKJBQT-QURGRASLSA-N.1">https://dx.doi.org/10.14272/HEZWXNUXEKJBQT-QURGRASLSA-N.1</a>                                                                                                                                      |
| 21sd | N#Cc1cn(nc1n1nnc(c1)c1cccc1)Cc1c(c(F)cc(c1)F           | <a href="https://dx.doi.org/10.14272/LBYPTGDZZSOCSK-UHFFFAOYSA-N.1">https://dx.doi.org/10.14272/LBYPTGDZZSOCSK-UHFFFAOYSA-N.1</a>                                                                                                                                      |
| 21ud | COC(=O)c1ccc(cc1)Cn1cc(c(n1)n1nnc(c1)c1cccc1)C#N       | <a href="https://dx.doi.org/10.14272/YZSLXIHSIJQQMB-UHFFFAOYSA-N.1">https://dx.doi.org/10.14272/YZSLXIHSIJQQMB-UHFFFAOYSA-N.1</a>                                                                                                                                      |
| 21ga | CCCC1nnn(c1)c1nn(c(c1)C)c1ccc(cc1)C#N                  | <a href="https://dx.doi.org/10.14272/WZTARLNNZGQBDW-UHFFFAOYSA-N.1">https://dx.doi.org/10.14272/WZTARLNNZGQBDW-UHFFFAOYSA-N.1</a>                                                                                                                                      |
| 21rd | N#Cc1cn(nc1n1nnc(c1)c1cccc1)Cc1cccc1                   | <a href="https://dx.doi.org/10.14272/DGWASOOTEXXJBK-UHFFFAOYSA-N.1">https://dx.doi.org/10.14272/DGWASOOTEXXJBK-UHFFFAOYSA-N.1</a>                                                                                                                                      |
| 21fa | CCCC1nnn(c1)c1cc(n(n1)Cc1cccc1)C                       | <a href="https://dx.doi.org/10.14272/PKNOMBYAWYDCG-UHFFFAOYSA-N.1">https://dx.doi.org/10.14272/PKNOMBYAWYDCG-UHFFFAOYSA-N.1</a>                                                                                                                                        |
| 21gd | N#Cc1ccc(cc1)n1nc(cc1C)n1nnc(c1)c1cccc1                | <a href="https://dx.doi.org/10.14272/QJHTUPAVPUUSNY-UHFFFAOYSA-N.1">https://dx.doi.org/10.14272/QJHTUPAVPUUSNY-UHFFFAOYSA-N.1</a><br><a href="https://dx.doi.org/10.14272/QJHTUPAVPUUSNY-UHFFFAOYSA-N.2">https://dx.doi.org/10.14272/QJHTUPAVPUUSNY-UHFFFAOYSA-N.2</a> |
| 17q  | COC(=O)c1ccc(cc1)Cn1nc(c(c1)C#N)/N=N/N(C(C)C)C(C)C     | <a href="https://dx.doi.org/10.14272/FZUUXBMFWLBSAE-XTQSDGFTSA-N.1">https://dx.doi.org/10.14272/FZUUXBMFWLBSAE-XTQSDGFTSA-N.1</a>                                                                                                                                      |
| 18q  | COC(=O)c1ccc(cc1)Cn1ncc(c1/N=N/N(C(C)C)C(C)C)C#N       | <a href="https://dx.doi.org/10.14272/HQEHAWORIRDNAT-GHVJWSGMSA-N.1">https://dx.doi.org/10.14272/HQEHAWORIRDNAT-GHVJWSGMSA-N.1</a>                                                                                                                                      |
| 21ce | COC1ccc(cc1)c1nnn(c1)c1ccn(n1)Cc1cccc1                 | <a href="https://dx.doi.org/10.14272/JMPSOWDQCFVJPL-UHFFFAOYSA-N.1">https://dx.doi.org/10.14272/JMPSOWDQCFVJPL-UHFFFAOYSA-N.1</a>                                                                                                                                      |
| 19q  | CCOC(=O)Cn1nc(c(c1)C#N)N=[N+]=[N-]                     | <a href="https://dx.doi.org/10.14272/HEIIGJFYWAHNFX-UHFFFAOYSA-N.1">https://dx.doi.org/10.14272/HEIIGJFYWAHNFX-UHFFFAOYSA-N.1</a>                                                                                                                                      |
| 17a  | CC(N(C(C)C)/N=N/c1ccn(n1)Cc1cccc1)C                    | <a href="https://dx.doi.org/10.14272/MGAVNYXVFXWSSZ-HTXNQAPBSA-N.1">https://dx.doi.org/10.14272/MGAVNYXVFXWSSZ-HTXNQAPBSA-N.1</a>                                                                                                                                      |
| 18a  | CC(N(C(C)C)/N=N/c1ccnn1Cc1cccc1)C                      | <a href="https://dx.doi.org/10.14272/ZIDRUQYCDSSWJM-VHEBQXMUSA-N.1">https://dx.doi.org/10.14272/ZIDRUQYCDSSWJM-VHEBQXMUSA-N.1</a>                                                                                                                                      |
| 21ic | CC(=O)OCc1nnn(c1)c1nn(c(c1)C)c1cc(c(cc1Cl)[N+](=O)[O-] | <a href="https://dx.doi.org/10.14272/QIRBWRVTFHDFHS-UHFFFAOYSA-N.1">https://dx.doi.org/10.14272/QIRBWRVTFHDFHS-UHFFFAOYSA-N.1</a>                                                                                                                                      |
| 17h  | CCOC(=O)c1cn(nc1/N=N/N(C(C)C)C(C)C)Cc1cccc1            | <a href="https://dx.doi.org/10.14272/GKODORMDVGUGHL-LSDHQDQOSA-N.1">https://dx.doi.org/10.14272/GKODORMDVGUGHL-LSDHQDQOSA-N.1</a>                                                                                                                                      |
| 18h  | CCOC(=O)c1cnn(c1/N=N/N(C(C)C)C(C)C)Cc1cccc1            | <a href="https://dx.doi.org/10.14272/UBBFWZTUXPGXCP-QURGRASLSA-N.1">https://dx.doi.org/10.14272/UBBFWZTUXPGXCP-QURGRASLSA-N.1</a>                                                                                                                                      |
| 17l  | N#Cc1cn(nc1/N=N/N(C(C)C)C(C)C)C(C)C                    | <a href="https://dx.doi.org/10.14272/XUZXRALOPOUFGP-BMRADRMJSA-N.1">https://dx.doi.org/10.14272/XUZXRALOPOUFGP-BMRADRMJSA-N.1</a>                                                                                                                                      |
| 18l  | N#Cc1cnn(c1/N=N/N(C(C)C)C(C)C)C(C)C                    | <a href="https://dx.doi.org/10.14272/IJEPRRMQECALCS-WUKNDPDISA-N.1">https://dx.doi.org/10.14272/IJEPRRMQECALCS-WUKNDPDISA-N.1</a>                                                                                                                                      |
| 21fe | COC1ccc(cc1)c1nnn(c1)c1nn(c(c1)C)C1cccc1               | <a href="https://dx.doi.org/10.14272/HKYHACNKJZVDCN-UHFFFAOYSA-N.1">https://dx.doi.org/10.14272/HKYHACNKJZVDCN-UHFFFAOYSA-N.1</a>                                                                                                                                      |

|      |                                                                             |                                                                                                                                     |
|------|-----------------------------------------------------------------------------|-------------------------------------------------------------------------------------------------------------------------------------|
| 17n  | <chem>N#Cc1cn(nc1/N=N/N(C(C)C)C(C)C)Cc1cccc1</chem>                         | <a href="https://dx.doi.org/10.14272/AONLLYWVGOMLR-XUTLUUPISA-N.2">https://dx.doi.org/10.14272/AONLLYWVGOMLR-XUTLUUPISA-N.2</a>     |
| 18n  | <chem>CC(N(C(C)C)/N=N/c1n(ncc1C#N)Cc1cccc1)C</chem>                         | <a href="https://dx.doi.org/10.14272/AQYSAXXLCHFEGV-QZQOTICOSA-N.2">https://dx.doi.org/10.14272/AQYSAXXLCHFEGV-QZQOTICOSA-N.2</a>   |
| 15b  | <chem>CC(N(C(C)C)/N=N/c1n[nH]c(c1)C)C</chem>                                | <a href="https://dx.doi.org/10.14272/SSAXAAXODLOITE-BUHFOSPRSA-N.1">https://dx.doi.org/10.14272/SSAXAAXODLOITE-BUHFOSPRSA-N.1</a>   |
| 19c  | <chem>[N-]=[N+]=Nc1ccn(n1)Cc1cccc1</chem>                                   | <a href="https://dx.doi.org/10.14272/VYAIIDYJDVIYCE-UHFFFAOYSA-N.1">https://dx.doi.org/10.14272/VYAIIDYJDVIYCE-UHFFFAOYSA-N.1</a>   |
| 19m  | <chem>CCOC(=O)c1cn(nc1N=[N+]=[N-])Cc1cccc(c1)C#N</chem>                     | <a href="https://dx.doi.org/10.14272/OZCFNQRRYBYULQ-UHFFFAOYSA-N.1">https://dx.doi.org/10.14272/OZCFNQRRYBYULQ-UHFFFAOYSA-N.1</a>   |
| 21hd | <chem>[O-][N+](=O)c1ccc(cc1)n1nc(cc1C)n1nnc(c1)c1cccc1</chem>               | <a href="https://dx.doi.org/10.14272/UFCSIROIFJMCPW-UHFFFAOYSA-N.1">https://dx.doi.org/10.14272/UFCSIROIFJMCPW-UHFFFAOYSA-N.1</a>   |
| 21vb | <chem>COC(=O)c1nnn(c1)c1nn(cc1C#N)Cc1ccc(cc1)F</chem>                       | <a href="https://dx.doi.org/10.14272/UUNQVGVZWMJXOZ-UHFFFAOYSA-N.1">https://dx.doi.org/10.14272/UUNQVGVZWMJXOZ-UHFFFAOYSA-N.1</a>   |
| 19i  | <chem>[N-]=[N+]=Nc1nn(c(c1)C)c1ccc(cc1Cl)[N+](=O)[O-]</chem>                | <a href="https://dx.doi.org/10.14272/GQMYHPXVWUDUZCD-UHFFFAOYSA-N.1">https://dx.doi.org/10.14272/GQMYHPXVWUDUZCD-UHFFFAOYSA-N.1</a> |
| 21tf | <chem>COC(=O)c1ccc(cc1)c1nnn(c1)c1nn(cc1C#N)Cc1ccc(cc1)C</chem>             | <a href="https://dx.doi.org/10.14272/DMRAVMAMSLYEBQ-UHFFFAOYSA-N.1">https://dx.doi.org/10.14272/DMRAVMAMSLYEBQ-UHFFFAOYSA-N.1</a>   |
| 21ed | <chem>Cc1[nH]nc(c1)n1nnc(c1)c1cccc1</chem>                                  | <a href="https://dx.doi.org/10.14272/BTYPCTNIHDBBSH-UHFFFAOYSA-N.1">https://dx.doi.org/10.14272/BTYPCTNIHDBBSH-UHFFFAOYSA-N.1</a>   |
| 21id | <chem>Clc1cc(ccc1n1nc(cc1C)n1nnc(c1)c1cccc1)[N+](=O)[O-]</chem>             | <a href="https://dx.doi.org/10.14272/NASFABBFATRIZ-UHFFFAOYSA-N.1">https://dx.doi.org/10.14272/NASFABBFATRIZ-UHFFFAOYSA-N.1</a>     |
| 21nd | <chem>CCOC(=O)c1cn(nc1n1nnc(c1)c1cccc1)Cc1ccc(cc1)Br</chem>                 | <a href="https://dx.doi.org/10.14272/VTYPYIREEKHMKL-UHFFFAOYSA-N.1">https://dx.doi.org/10.14272/VTYPYIREEKHMKL-UHFFFAOYSA-N.1</a>   |
| 21na | <chem>CCCCc1nnn(c1)c1nn(cc1C(=O)OCC)Cc1ccc(cc1)Br</chem>                    | <a href="https://dx.doi.org/10.14272/YERIOOVHZOGENU-UHFFFAOYSA-N.1">https://dx.doi.org/10.14272/YERIOOVHZOGENU-UHFFFAOYSA-N.1</a>   |
| 21nc | <chem>CCOC(=O)c1cn(nc1n1nnc(c1)COC(=O)C)Cc1ccc(cc1)Br</chem>                | <a href="https://dx.doi.org/10.14272/JINGCLNWAMKPG-UHFFFAOYSA-N.1">https://dx.doi.org/10.14272/JINGCLNWAMKPG-UHFFFAOYSA-N.1</a>     |
| 21me | <chem>CCOC(=O)c1cn(nc1n1nnc(c1)c1ccc(cc1)OC)Cc1cccc(c1)C#N</chem>           | <a href="https://dx.doi.org/10.14272/KJMWCYALHNEPDX-UHFFFAOYSA-N.1">https://dx.doi.org/10.14272/KJMWCYALHNEPDX-UHFFFAOYSA-N.1</a>   |
| 21mh | <chem>CCOC(=O)c1cn(nc1n1nnc(c1)CN1C(=O)c2c(C1=O)cccc2)Cc1cccc(c1)C#N</chem> | <a href="https://dx.doi.org/10.14272/RJXQILXRDFYRBG-UHFFFAOYSA-N.1">https://dx.doi.org/10.14272/RJXQILXRDFYRBG-UHFFFAOYSA-N.1</a>   |
| 21lc | <chem>CCOC(=O)c1cn(nc1n1nnc(c1)COC(=O)C)Cc1cc(F)cc(c1)F</chem>              | <a href="https://dx.doi.org/10.14272/OEMVMGJIOKDNBC-UHFFFAOYSA-N.1">https://dx.doi.org/10.14272/OEMVMGJIOKDNBC-UHFFFAOYSA-N.1</a>   |
| 19t  | <chem>[N-]=[N+]=Nc1nn(cc1C#N)Cc1ccc(cc1)C</chem>                            | <a href="https://dx.doi.org/10.14272/NMQYIKIIUJYZLGH-UHFFFAOYSA-N.1">https://dx.doi.org/10.14272/NMQYIKIIUJYZLGH-UHFFFAOYSA-N.1</a> |
| 19n  | <chem>CCOC(=O)c1cn(nc1N=[N+]=[N-])Cc1ccc(cc1)Br</chem>                      | <a href="https://dx.doi.org/10.14272/XWYLZJSXZASHCL-UHFFFAOYSA-N.1">https://dx.doi.org/10.14272/XWYLZJSXZASHCL-UHFFFAOYSA-N.1</a>   |
| 21hc | <chem>CC(=O)OCc1nnn(c1)c1nn(c(c1)C)c1ccc(cc1)[N+](=O)[O-]</chem>            | <a href="https://dx.doi.org/10.14272/GFUNAXVZSJSISA-UHFFFAOYSA-N.1">https://dx.doi.org/10.14272/GFUNAXVZSJSISA-UHFFFAOYSA-N.1</a>   |
| 21ia | <chem>CCCCc1nnn(c1)c1nn(c(c1)C)c1ccc(cc1Cl)[N+](=O)[O-]</chem>              | <a href="https://dx.doi.org/10.14272/JCVTZTZCOPFHML-UHFFFAOYSA-N.1">https://dx.doi.org/10.14272/JCVTZTZCOPFHML-UHFFFAOYSA-N.1</a>   |
| 21ta | <chem>CCCCc1nnn(c1)c1nn(cc1C#N)Cc1ccc(cc1)C</chem>                          | <a href="https://dx.doi.org/10.14272/FGLOKNGZLSDWMZ-UHFFFAOYSA-N.1">https://dx.doi.org/10.14272/FGLOKNGZLSDWMZ-UHFFFAOYSA-N.1</a>   |
| 21tg | <chem>N#Cc1cn(nc1n1nnc(c1)c1ccc(cc1)N(C)C)Cc1ccc(cc1)C</chem>               | <a href="https://dx.doi.org/10.14272/PIHYCVSEWQEZE-UHFFFAOYSA-N.1">https://dx.doi.org/10.14272/PIHYCVSEWQEZE-UHFFFAOYSA-N.1</a>     |
| 21pd | <chem>N#Cc1cn(nc1n1nnc(c1)c1cccc1)C(C)C</chem>                              | <a href="https://dx.doi.org/10.14272/OYRDJONMMXESTQ-UHFFFAOYSA-N.1">https://dx.doi.org/10.14272/OYRDJONMMXESTQ-UHFFFAOYSA-N.1</a>   |

|      |                                                                      |                                                                                                                                     |
|------|----------------------------------------------------------------------|-------------------------------------------------------------------------------------------------------------------------------------|
| 21pa | <chem>CCCCc1nnn(c1)c1nn(cc1C#N)C(C)C</chem>                          | <a href="https://dx.doi.org/10.14272/NOJZURFWHMPYCF-UHFFFAOYSA-N.1">https://dx.doi.org/10.14272/NOJZURFWHMPYCF-UHFFFAOYSA-N.1</a>   |
| 17j  | <chem>CCOC(=O)c1cn(nc1/N=N/N(C(C)C)C(C)C)Cc1cccc(c1)C#N</chem>       | <a href="https://dx.doi.org/10.14272/NUENLEYWZUNRJJ-ZNTNEXAZSA-N.1">https://dx.doi.org/10.14272/NUENLEYWZUNRJJ-ZNTNEXAZSA-N.1</a>   |
| 18j  | <chem>CCOC(=O)c1cnn(c1/N=N/N(C(C)C)C(C)C)Cc1cccc(c1)C#N</chem>       | <a href="https://dx.doi.org/10.14272/WTPBPRNMORPMPY-WCWDXBQESA-N.1">https://dx.doi.org/10.14272/WTPBPRNMORPMPY-WCWDXBQESA-N.1</a>   |
| 17g  | <chem>CC(N(C(C)C)/N=N/c1nn(c(c1)C)c1ccc(cc1Cl)[N+](=O)[O-])C</chem>  | <a href="https://dx.doi.org/10.14272/TYZBFJHLBYOAAUCZIZESTLSA-N.1">https://dx.doi.org/10.14272/TYZBFJHLBYOAAUCZIZESTLSA-N.1</a>     |
| 18g  | <chem>CC(N(C(C)C)/N=N/c1cc(nn1c1ccc(cc1Cl)[N+](=O)[O-])C)C</chem>    | <a href="https://dx.doi.org/10.14272/ACQCSRYTLZFICQCZIZESTLSA-N.1">https://dx.doi.org/10.14272/ACQCSRYTLZFICQCZIZESTLSA-N.1</a>     |
| 21ea | <chem>CCCCc1nnn(c1)c1n[nH]c(c1)C</chem>                              | <a href="https://dx.doi.org/10.14272/QKYKTOGQTOIHKO-UHFFFAOYSA-N.1">https://dx.doi.org/10.14272/QKYKTOGQTOIHKO-UHFFFAOYSA-N.1</a>   |
| 21eb | <chem>COC(=O)c1nnn(c1)c1n[nH]c(c1)C</chem>                           | <a href="https://dx.doi.org/10.14272/AXYCMAQNQSYSIG-UHFFFAOYSA-N.1">https://dx.doi.org/10.14272/AXYCMAQNQSYSIG-UHFFFAOYSA-N.1</a>   |
| 21vg | <chem>N#Cc1cn(nc1n1nnc(c1)c1ccc(cc1)N(C)C)Cc1ccc(cc1)F</chem>        | <a href="https://dx.doi.org/10.14272/UIXMTYDHDCHVFR-UHFFFAOYSA-N.1">https://dx.doi.org/10.14272/UIXMTYDHDCHVFR-UHFFFAOYSA-N.1</a>   |
| 19f  | <chem>[N-]=[N+]=Nc1nn(c(c1)C)Cc1cccc1</chem>                         | <a href="https://dx.doi.org/10.14272/CUZSOFWTCLMWBL-UHFFFAOYSA-N.1">https://dx.doi.org/10.14272/CUZSOFWTCLMWBL-UHFFFAOYSA-N.1</a>   |
| 17m  | <chem>CCOC(=O)Cn1nc(c(c1)C#N)/N=N/N(C(C)C)C(C)C</chem>               | <a href="https://dx.doi.org/10.14272/GMSYXQOQYOUAHU-FBMGVBCBSA-N.2">https://dx.doi.org/10.14272/GMSYXQOQYOUAHU-FBMGVBCBSA-N.2</a>   |
| 18m  | <chem>CCOC(=O)Cn1ncc(c1/N=N/N(C(C)C)C(C)C)C#N</chem>                 | <a href="https://dx.doi.org/10.14272/UVXRQPKXJULFTRISLYRVAYSAN.2">https://dx.doi.org/10.14272/UVXRQPKXJULFTRISLYRVAYSAN.2</a>       |
| 17b  | <chem>CC(N(C(C)C)/N=N/c1ccn(n1)Cc1ccc(c(c1)Br)C</chem>               | <a href="https://dx.doi.org/10.14272/OJEKMYNEGYNUPP-CZIZESTLSA-N.1">https://dx.doi.org/10.14272/OJEKMYNEGYNUPP-CZIZESTLSA-N.1</a>   |
| 18b  | <chem>Brc1ccc(cc1)Cn1nccc1/N=N/N(C(C)C)C(C)C</chem>                  | <a href="https://dx.doi.org/10.14272/PLVZHOAUEJAYPSFMQUCEESA-N.1">https://dx.doi.org/10.14272/PLVZHOAUEJAYPSFMQUCEESA-N.1</a>       |
| 17i  | <chem>CCOC(=O)c1cn(nc1/N=N/N(C(C)C)C(C)C)Cc1cc(F)cc(c1)F</chem>      | <a href="https://dx.doi.org/10.14272/HJNVDSRILWJTQVZNTNEXAZSA-N.1">https://dx.doi.org/10.14272/HJNVDSRILWJTQVZNTNEXAZSA-N.1</a>     |
| 18i  | <chem>CCOC(=O)c1cnn(c1/N=N/N(C(C)C)C(C)C)Cc1cc(F)cc(c1)F</chem>      | <a href="https://dx.doi.org/10.14272/XCKSGKZXEXJBOYWCWDXBQESA-N.1">https://dx.doi.org/10.14272/XCKSGKZXEXJBOYWCWDXBQESA-N.1</a>     |
| 17o  | <chem>N#Cc1cn(nc1/N=N/N(C(C)C)C(C)C)Cc1cc(F)cc(c1)F</chem>           | <a href="https://dx.doi.org/10.14272/WSQPCVJPBSUDNZ-XTQSDGFTSA-N.2">https://dx.doi.org/10.14272/WSQPCVJPBSUDNZ-XTQSDGFTSA-N.2</a>   |
| 18o  | <chem>CC(N(C(C)C)/N=N/c1n(ncc1C#N)Cc1cc(F)cc(c1)F)C</chem>           | <a href="https://dx.doi.org/10.14272/ZFEWCQZPKGQXCJ-GHVJWSGMSA-N.2">https://dx.doi.org/10.14272/ZFEWCQZPKGQXCJ-GHVJWSGMSA-N.2</a>   |
| 21jh | <chem>CCOC(=O)c1c[nH]nc1n1nnc(c1)CN1C(=O)c2c(C1=O)cccc2</chem>       | <a href="https://dx.doi.org/10.14272/GMOYQWJQIYZFIE-UHFFFAOYSA-N.1">https://dx.doi.org/10.14272/GMOYQWJQIYZFIE-UHFFFAOYSA-N.1</a>   |
| 21th | <chem>N#Cc1cn(nc1n1nnc(c1)CN1C(=O)c2c(C1=O)cccc2)Cc1ccc(cc1)C</chem> | <a href="https://dx.doi.org/10.14272/FODYZQGXSSTMHJ-UHFFFAOYSA-N.1">https://dx.doi.org/10.14272/FODYZQGXSSTMHJ-UHFFFAOYSA-N.1</a>   |
| 21oa | <chem>CCCCc1nnn(c1)c1n[nH]cc1C#N</chem>                              | <a href="https://dx.doi.org/10.14272/USLFBJCHBNQGGJB-UHFFFAOYSA-N.1">https://dx.doi.org/10.14272/USLFBJCHBNQGGJB-UHFFFAOYSA-N.1</a> |
| 21he | <chem>COc1ccc(cc1)c1nnn(c1)c1cc(n(n1)c1ccc(cc1)[N+](=O)[O-])C</chem> | <a href="https://dx.doi.org/10.14272/IZEQOYLPBRFYRC-UHFFFAOYSA-N.1">https://dx.doi.org/10.14272/IZEQOYLPBRFYRC-UHFFFAOYSA-N.1</a>   |
| 21jc | <chem>CCOC(=O)c1c[nH]nc1n1nnc(c1)COC(=O)C</chem>                     | <a href="https://dx.doi.org/10.14272/RJHHGQMRVYAAGU-UHFFFAOYSA-N.1">https://dx.doi.org/10.14272/RJHHGQMRVYAAGU-UHFFFAOYSA-N.1</a>   |
| 21of | <chem>COC(=O)c1ccc(cc1)c1nnn(c1)c1n[nH]cc1C#N</chem>                 | <a href="https://dx.doi.org/10.14272/FXIYGLHLKLOXQB-UHFFFAOYSA-N.1">https://dx.doi.org/10.14272/FXIYGLHLKLOXQB-UHFFFAOYSA-N.1</a>   |
| 19s  | <chem>[N-]=[N+]=Nc1nn(cc1C#N)Cc1cc(F)cc(c1)F</chem>                  | <a href="https://dx.doi.org/10.14272/WBMURKUEYYRUPK-UHFFFAOYSA-N.1">https://dx.doi.org/10.14272/WBMURKUEYYRUPK-UHFFFAOYSA-N.1</a>   |
| 19l  | <chem>CCOC(=O)c1cn(nc1N=[N+]=[N-])Cc1cc(F)cc(c1)F</chem>             | <a href="https://dx.doi.org/10.14272/BZRWHBSLSABJOL-UHFFFAOYSA-N.1">https://dx.doi.org/10.14272/BZRWHBSLSABJOL-UHFFFAOYSA-N.1</a>   |

|      |                                                                              |                                                                                                                                     |
|------|------------------------------------------------------------------------------|-------------------------------------------------------------------------------------------------------------------------------------|
| 21jd | <chem>CCOC(=O)c1c[nH]nc1n1nnc(c1)c1ccc<br/>cc1</chem>                        | <a href="https://dx.doi.org/10.14272/JZSBUPSAIWVYFE-UHFFFAOYSA-N.2">https://dx.doi.org/10.14272/JZSBUPSAIWVYFE-UHFFFAOYSA-N.2</a>   |
| 19e  | <chem>[N-]=[N+]=Nc1cc([nH]n1)C</chem>                                        | <a href="https://dx.doi.org/10.14272/ASYITVIZQLPDSI-UHFFFAOYSA-N.1">https://dx.doi.org/10.14272/ASYITVIZQLPDSI-UHFFFAOYSA-N.1</a>   |
| 21ab | <chem>COC(=O)c1nnn(c1)c1n[nH]cc1</chem>                                      | <a href="https://dx.doi.org/10.14272/PWKBPBPHBEDIORH-UHFFFAOYSA-N.1">https://dx.doi.org/10.14272/PWKBPBPHBEDIORH-UHFFFAOYSA-N.1</a> |
| 21bb | <chem>COC(=O)c1nnn(c1)c1ccn(n1)C1CCCC<br/>1</chem>                           | <a href="https://dx.doi.org/10.14272/RZTMDUAYRSTLAQ-UHFFFAOYSA-N.1">https://dx.doi.org/10.14272/RZTMDUAYRSTLAQ-UHFFFAOYSA-N.1</a>   |
| 21ae | <chem>COc1ccc(cc1)c1nnn(c1)c1n[nH]cc1</chem>                                 | <a href="https://dx.doi.org/10.14272/PQOYNAQPLQYWL-UHFFFAOYSA-N.1">https://dx.doi.org/10.14272/PQOYNAQPLQYWL-UHFFFAOYSA-N.1</a>     |
| 21aa | <chem>CCCCc1cn(nn1)c1cc[nH]n1</chem>                                         | <a href="https://dx.doi.org/10.14272/NLSVJZHXBPIQPM-UHFFFAOYSA-N.1">https://dx.doi.org/10.14272/NLSVJZHXBPIQPM-UHFFFAOYSA-N.1</a>   |
| 21ef | <chem>COC(=O)c1ccc(cc1)c1nnn(c1)c1n[nH]<br/>c(c1)C</chem>                    | <a href="https://dx.doi.org/10.14272/ICPVQAYXOPZIKF-UHFFFAOYSA-N.1">https://dx.doi.org/10.14272/ICPVQAYXOPZIKF-UHFFFAOYSA-N.1</a>   |
| 19b  | <chem>[N-]=[N+]=Nc1ccn(n1)C1CCCC1</chem>                                     | <a href="https://dx.doi.org/10.14272/CEJMUQXTWWQJBT-UHFFFAOYSA-N.2">https://dx.doi.org/10.14272/CEJMUQXTWWQJBT-UHFFFAOYSA-N.2</a>   |
| 19d  | <chem>[N-]=[N+]=Nc1ccn(n1)Cc1ccc(cc1)Br</chem>                               | <a href="https://dx.doi.org/10.14272/MPLVWOQSFNIWDU-UHFFFAOYSA-N.2">https://dx.doi.org/10.14272/MPLVWOQSFNIWDU-UHFFFAOYSA-N.2</a>   |
| 15a  | <chem>CC(N(C(C)C)/N=N/c1n[nH]cc1)C</chem>                                    | <a href="https://dx.doi.org/10.14272/LKGAYQXGDXKVD-A-OUKQBFOZSA-N.1">https://dx.doi.org/10.14272/LKGAYQXGDXKVD-A-OUKQBFOZSA-N.1</a> |
| 21sa | <chem>CCCCc1nnn(c1)c1nn(cc1C#N)Cc1cc(F)<br/>cc(c1)F</chem>                   | <a href="https://dx.doi.org/10.14272/APGSEIDPRRFBQ-UHFFFAOYSA-N.1">https://dx.doi.org/10.14272/APGSEIDPRRFBQ-UHFFFAOYSA-N.1</a>     |
| 21ec | <chem>CC(=O)OCc1nnn(c1)c1n[nH]c(c1)C</chem>                                  | <a href="https://dx.doi.org/10.14272/LUTGSYAMTQUJGA-UHFFFAOYSA-N.1">https://dx.doi.org/10.14272/LUTGSYAMTQUJGA-UHFFFAOYSA-N.1</a>   |
| 21od | <chem>N#Cc1c[nH]nc1n1nnc(c1)c1cccc1</chem>                                   | <a href="https://dx.doi.org/10.14272/VSYUPFQKDFVQCM-UHFFFAOYSA-N.1">https://dx.doi.org/10.14272/VSYUPFQKDFVQCM-UHFFFAOYSA-N.1</a>   |
| 21be | <chem>COc1ccc(cc1)c1nnn(c1)c1ccn(n1)C1C<br/>CCC1</chem>                      | <a href="https://dx.doi.org/10.14272/SYHGOJNCDVCRGL-UHFFFAOYSA-N.1">https://dx.doi.org/10.14272/SYHGOJNCDVCRGL-UHFFFAOYSA-N.1</a>   |
| 21qa | <chem>CCCCc1nnn(c1)c1nn(cc1C#N)CC(=O)<br/>OCC</chem>                         | <a href="https://dx.doi.org/10.14272/ZOQWDAUGOCUFLP-UHFFFAOYSA-N.1">https://dx.doi.org/10.14272/ZOQWDAUGOCUFLP-UHFFFAOYSA-N.1</a>   |
| 21ja | <chem>CCCCc1nnn(c1)c1n[nH]cc1C(=O)OCC</chem>                                 | <a href="https://dx.doi.org/10.14272/CDDXWUAJGLDUKH-UHFFFAOYSA-N.1">https://dx.doi.org/10.14272/CDDXWUAJGLDUKH-UHFFFAOYSA-N.1</a>   |
| 21de | <chem>COc1ccc(cc1)c1nnn(c1)c1ccn(n1)Cc1<br/>ccc(cc1)Br</chem>                | <a href="https://dx.doi.org/10.14272/QXNOXRDOZJZFO-UHFFFAOYSA-N.1">https://dx.doi.org/10.14272/QXNOXRDOZJZFO-UHFFFAOYSA-N.1</a>     |
| 21db | <chem>COC(=O)c1nnn(c1)c1ccn(n1)Cc1ccc(c<br/>c1)Br</chem>                     | <a href="https://dx.doi.org/10.14272/CNHRLRYEDLASIW-UHFFFAOYSA-N.1">https://dx.doi.org/10.14272/CNHRLRYEDLASIW-UHFFFAOYSA-N.1</a>   |
| 21lf | <chem>CCOC(=O)c1cn(nc1n1nnc(c1)c1ccc(cc<br/>1)C(=O)OC)Cc1cc(F)cc(c1)F</chem> | <a href="https://dx.doi.org/10.14272/WJPCYFBJDHGFTN-UHFFFAOYSA-N.1">https://dx.doi.org/10.14272/WJPCYFBJDHGFTN-UHFFFAOYSA-N.1</a>   |
| 21oc | <chem>N#Cc1c[nH]nc1n1nnc(c1)COC(=O)C</chem>                                  | <a href="https://dx.doi.org/10.14272/QROBBVJEUOFHFJ-UHFFFAOYSA-N.1">https://dx.doi.org/10.14272/QROBBVJEUOFHFJ-UHFFFAOYSA-N.1</a>   |
| 17c  | <chem>CC(N(C(C)C)/N=N/c1ccn(n1)C1CCCC1<br/>)C</chem>                         | <a href="https://dx.doi.org/10.14272/JJSUJDRUQGTCCKX-BMRADRMJSA-N.1">https://dx.doi.org/10.14272/JJSUJDRUQGTCCKX-BMRADRMJSA-N.1</a> |
| 18c  | <chem>CC(N(C(C)C)/N=N/c1ccnn1C1CCCC1)<br/>C</chem>                           | <a href="https://dx.doi.org/10.14272/BWAGQJOINMBVOL-WUKNDPDISA-N.1">https://dx.doi.org/10.14272/BWAGQJOINMBVOL-WUKNDPDISA-N.1</a>   |
| 21kd | <chem>CCOC(=O)c1cn(nc1n1nnc(c1)c1cccc<br/>1)Cc1cccc1</chem>                  | <a href="https://dx.doi.org/10.14272/BFHMQUIVAONQIIQ-UHFFFAOYSA-N.1">https://dx.doi.org/10.14272/BFHMQUIVAONQIIQ-UHFFFAOYSA-N.1</a> |
| 19g  | <chem>[N-]<br/>]=[N+]=Nc1nn(c(c1)C)c1ccc(cc1)C#N</chem>                      | <a href="https://dx.doi.org/10.14272/KIQBPEXSAZKVRU-UHFFFAOYSA-N.1">https://dx.doi.org/10.14272/KIQBPEXSAZKVRU-UHFFFAOYSA-N.1</a>   |
| 21td | <chem>N#Cc1cn(nc1n1nnc(c1)c1cccc1)Cc1c<br/>cc(cc1)C</chem>                   | <a href="https://dx.doi.org/10.14272/ZHUFVXOCSYMTKK-UHFFFAOYSA-N.1">https://dx.doi.org/10.14272/ZHUFVXOCSYMTKK-UHFFFAOYSA-N.1</a>   |

|             |                                                                          |                                                                                                                                                   |
|-------------|--------------------------------------------------------------------------|---------------------------------------------------------------------------------------------------------------------------------------------------|
| <b>21gh</b> | <chem>N#Cc1ccc(cc1)n1nc(cc1C)n1nnc(c1)C<br/>N1C(=O)c2c(C1=O)cccc2</chem> | <a href="https://dx.doi.org/10.14272/DWYBPGPEFGKM&lt;br/&gt;QS-UHFFFAOYSA-N.1">https://dx.doi.org/10.14272/DWYBPGPEFGKM<br/>QS-UHFFFAOYSA-N.1</a> |
| <b>21ee</b> | <chem>COc1ccc(cc1)c1nnn(c1)c1n[nH]c(c1)C</chem>                          | <a href="https://dx.doi.org/10.14272/WNRIJNCEJHFAPB-&lt;br/&gt;UHFFFAOYSA-N.2">https://dx.doi.org/10.14272/WNRIJNCEJHFAPB-<br/>UHFFFAOYSA-N.2</a> |
| <b>19o</b>  | <chem>[N-]=[N+]=Nc1n[nH]cc1C#N</chem>                                    | <a href="https://dx.doi.org/10.14272/FMLLTFUXLLAWN-&lt;br/&gt;UHFFFAOYSA-N.1">https://dx.doi.org/10.14272/FMLLTFUXLLAWN-<br/>UHFFFAOYSA-N.1</a>   |
| <b>19a</b>  | <chem>[N-]=[N+]=Nc1cc[nH]n1</chem>                                       | <a href="https://dx.doi.org/10.14272/KKKGXLRKPKJON-&lt;br/&gt;UHFFFAOYSA-N.1">https://dx.doi.org/10.14272/KKKGXLRKPKJON-<br/>UHFFFAOYSA-N.1</a>   |
| <b>19p</b>  | <chem>[N-]=[N+]=Nc1nn(cc1C#N)C(C)C</chem>                                | <a href="https://dx.doi.org/10.14272/XHQDUCMTSCUCR&lt;br/&gt;X-UHFFFAOYSA-N.1">https://dx.doi.org/10.14272/XHQDUCMTSCUCR<br/>X-UHFFFAOYSA-N.1</a> |
| <b>19r</b>  | <chem>[N-]=[N+]=Nc1nn(cc1C#N)Cc1cccc1</chem>                             | <a href="https://dx.doi.org/10.14272/BZGHBVIXEDKDEK-&lt;br/&gt;UHFFFAOYSA-N.1">https://dx.doi.org/10.14272/BZGHBVIXEDKDEK-<br/>UHFFFAOYSA-N.1</a> |
| <b>19k</b>  | <chem>CCOC(=O)c1cn(nc1N=[N+]=[N-<br/>])Cc1cccc1</chem>                   | <a href="https://dx.doi.org/10.14272/KCAXRYJMUFAPLD-&lt;br/&gt;UHFFFAOYSA-N.1">https://dx.doi.org/10.14272/KCAXRYJMUFAPLD-<br/>UHFFFAOYSA-N.1</a> |
| <b>19v</b>  | <chem>[N-<br/>]=[N+]=Nc1nn(cc1C#N)Cc1ccc(cc1)F</chem>                    | <a href="https://dx.doi.org/10.14272/KJPMFOGUNJZON&lt;br/&gt;N-UHFFFAOYSA-N.1">https://dx.doi.org/10.14272/KJPMFOGUNJZON<br/>N-UHFFFAOYSA-N.1</a> |
| <b>19h</b>  | <chem>[N-<br/>]=[N+]=Nc1nn(c(c1)C)c1ccc(cc1)[N+](<br/>=O)[O-]</chem>     | <a href="https://dx.doi.org/10.14272/HISYWPICEGTOTQ-&lt;br/&gt;UHFFFAOYSA-N.1">https://dx.doi.org/10.14272/HISYWPICEGTOTQ-<br/>UHFFFAOYSA-N.1</a> |
| <b>19d</b>  | <chem>[N-]=[N+]=Nc1ccn(n1)Cc1ccc(cc1)Br</chem>                           | <a href="https://dx.doi.org/10.14272/MPLVWOQSFNIW&lt;br/&gt;DU-UHFFFAOYSA-N.1">https://dx.doi.org/10.14272/MPLVWOQSFNIW<br/>DU-UHFFFAOYSA-N.1</a> |
| <b>19j</b>  | <chem>[N-]=[N+]=Nc1n[nH]cc1C(=O)OCC</chem>                               | <a href="https://dx.doi.org/10.14272/FSJHWJVEYJIYBP-&lt;br/&gt;UHFFFAOYSA-N.1">https://dx.doi.org/10.14272/FSJHWJVEYJIYBP-<br/>UHFFFAOYSA-N.1</a> |
| <b>15c</b>  | <chem>CCOC(=O)c1c[nH]nc1/N=N/N(C(C)C)<br/>C(C)C</chem>                   | <a href="https://dx.doi.org/10.14272/XLGLVRGMYSDF&lt;br/&gt;W-FOCLMDBBSA-N.1">https://dx.doi.org/10.14272/XLGLVRGMYSDF<br/>W-FOCLMDBBSA-N.1</a>   |
